# Supplementary material for: A Dual Electrode Biosensor for Glucose and Lactate Measurement in Normal and Prolonged Obese Mice Using Single Drop of Whole Blood
Source: Biosensors (Basel). 2021 Dec 9;11(12):507. doi: 10.3390/bios11120507 (PMC8699454; doi:10.3390/bios11120507)
Supplement: Supplementary file 1 [file biosensors-11-00507-s001.zip › biosensors-1479975-supplementary.pdf]

Article

# A Dual Electrode Biosensor for Glucose and Lactate Measurement in Normal and Prolonged Obese Mice Using Single Drop of Whole Blood

Mukesh Thapa, Ryong Sung and Yun Seok Heo \*

Department of Biomedical Engineering, School of Medicine, Keimyung University, 1095 Dalgubeol-daero, Dalseo-gu, Daegu 42601, Korea; 1004672@stu.kmu.ac.kr (M.T.); rs.ryongs@gmail.com (R.S.)

\* Correspondence: yunsheo@kmu.ac.kr

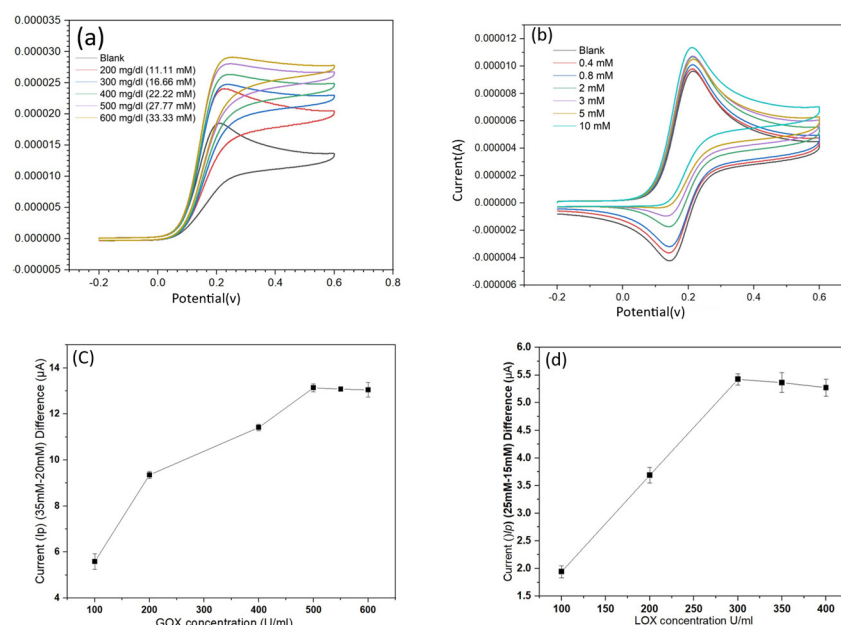

**Figure S1.** Methodology optimization: (a) CV responses of glucose solutions from 200mg/dl to 600mg/dl on GOX deposited SPCEs and (b) CV responses of lactate solutions from 0.5 to 10 mM on LOX deposited SPCEs. (c) difference of  $I_p$  generated by 35 mM and 20 mM glucose on DWE prepared with linear Gox concentration (100 U/mL to 600 U/mL). (d) difference of  $I_p$  generated by 25 mM and 15 mM lactate on DWE prepared with linear LOX concentration (100 U/mL to 400 U/mL). The measurement of each condition was conducted in triplicate.

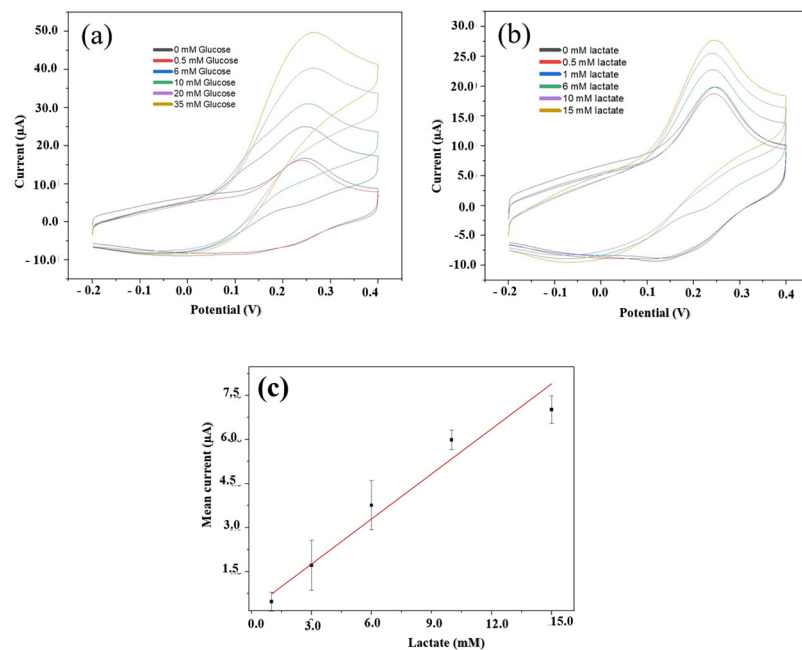

**Figure S2.** Desorption study: **(a)** CV responses of glucose solutions from 0 to 35 mM on DWE, measured after generation of CV response for lactate present on same solution. **(b)** CV responses of lactate solutions from 0.5 to 15 mM on DWE, measured before glucose solution present on same solution **(c)** calibration curve for lactate generated using  $I_p$  of (b). The fluctuation in  $I_p$  of glucose and lactate was potentially caused by desorption-mediated diffusion.
